# Supplementary material for: Clinical significance of pretreatment prognostic nutritional index and lymphocyte-to-monocyte ratio in patients with advanced p16-negative oropharyngeal cancer—a retrospective study
Source: PeerJ. 2020 Dec 1;8:e10465. doi: 10.7717/peerj.10465 (PMC7718802; doi:10.7717/peerj.10465)
Supplement: Supplemental Information 1 [file peerj-08-10465-s001.xlsx]

## Sheet: Raw data
No.	Sex	Age	p16 status	Clinical T classification	Clinical N classification	Clinical Stage (AJCC 8th edition)	Clinical ENE	Alcohol drinking	Betel nut chewing	Smoking habit	Pretreatment Albumin level	PNI	LMR	Recurrence	Disease-free time (Month)	Follow-up time (Month)	Current/Last status
1	M	56	negative	4b	2b	IVB	negative	yes	no	yes	3.8	43.2	1.73	no	50.6	50.6	DWOD
2	M	48	negative	2	3b	IVB	positive	yes	yes	yes	3.8	47.46	4.29	yes	10.4	46.1	DWOD
3	M	49	negative	4b	3b	IVB	positive	yes	yes	yes	4.1	49.93	3.03	no	27.8	27.8	DWOD
4	M	57	negative	4b	0	IVB	negative	no	no	yes	4.1	52.7	4.84	yes	3.3	16.6	DOD
5	M	56	negative	4a	2b	IVA	negative	yes	yes	yes	4.3	52.33	4.35	no	63.9	63.9	NED
6	F	43	negative	4b	0	IVB	negative	yes	yes	yes	3.4	40.19	1.72	yes	3.7	11.8	DOD
7	M	54	negative	4a	3b	IVB	positive	yes	yes	yes	3.5	40.25	2.12	yes	3.9	11.2	DOD
8	M	58	negative	2	2c	IVA	negative	yes	no	yes	4.5	54.44	4.66	yes	30.1	43.2	DOD
9	M	55	negative	4b	2c	IVB	negative	yes	yes	yes	4.1	47.11	2.58	yes	3.9	5.4	DOD
10	M	54	negative	4b	3b	IVB	positive	yes	yes	yes	4.1	48.48	2.07	yes	2.4	19.8	DOD
11	M	50	negative	4b	1	IVB	negative	yes	yes	yes	3.9	49.1	4.2	yes	38.2	44.2	DOD
12	M	66	negative	4b	2c	IVB	negative	yes	yes	yes	4.7	54.22	1.32	no	73.6	73.6	NED
13	M	54	negative	3	3b	IVB	positive	yes	yes	yes	-	-	0.65	no	29	29	DWOD
14	M	47	negative	3	3b	IVB	positive	yes	yes	yes	4.3	49.99	3.18	yes	12.3	27.6	DOD
15	M	53	negative	4a	3b	IVB	positive	yes	no	yes	4	52.02	6.25	yes	3.2	8.9	DOD
16	M	59	negative	4a	3b	IVB	positive	yes	yes	yes	3.9	55.16	5.67	no	46.1	46.1	NED
17	M	50	negative	4b	2c	IVB	negative	yes	yes	yes	4.2	53.1	3.96	no	69.1	69.1	NED
18	M	51	negative	4b	2c	IVB	negative	yes	yes	yes	3.4	40.63	3.16	no	21.3	21.3	DWOD
19	M	72	negative	3	1	III	negative	yes	no	yes	3.9	43.74	3	no	48.4	48.4	DWOD
20	M	54	negative	4b	0	IVB	negative	yes	yes	yes	3.9	46.74	2.65	no	71.8	71.8	DWOD
21	M	46	negative	4b	3b	IVB	positive	yes	yes	yes	4.5	55.28	5.14	no	70.8	70.8	NED
22	M	52	negative	3	2b	IVA	negative	no	no	yes	4.2	49.44	4.68	no	61.1	61.1	NED
23	M	53	negative	3	3b	IVB	positive	no	yes	yes	4.1	47.16	2.71	no	60.5	60.5	NED
24	M	40	negative	4b	2b	IVB	negative	yes	yes	yes	4.2	52.21	5.63	no	41.3	41.3	DWOD
25	M	52	negative	4a	3b	IVB	positive	yes	yes	yes	4.2	47.75	2.15	yes	2.2	8.6	DOD
26	M	44	negative	4a	0	IVA	negative	no	no	yes	3.7	44.07	2.85	no	88.5	88.5	NED
27	M	59	negative	4b	2b	IVB	negative	yes	yes	yes	3.8	46.13	4.4	yes	18.7	20.4	DOD
28	M	43	negative	4a	2c	IVA	negative	yes	yes	yes	4.1	48.89	2.97	no	66.2	66.2	NED
29	M	48	negative	2	1	III	negative	yes	yes	yes	-	-	3.57	no	76.4	76.4	NED
30	M	48	negative	3	3b	IVB	positive	yes	yes	yes	4.3	49.25	1.7	yes	17.3	41.2	DOD
31	M	44	negative	3	1	III	negative	yes	yes	no	4.5	50.91	5.55	no	58.6	58.6	NED
32	M	53	negative	4a	0	IVA	negative	yes	yes	yes	4.2	52.29	5.2	yes	13.8	22.4	DOD
33	M	49	negative	4b	3b	IVB	positive	yes	yes	yes	4.5	60.17	4.99	yes	2.8	12.6	DOD
34	M	47	negative	1	3b	IVB	positive	yes	yes	yes	4.2	53.27	4.85	yes	51.5	65.5	AwD
35	M	55	negative	3	2c	IVA	negative	yes	yes	yes	4	48.14	4.18	no	39.3	39.3	DOD
36	M	51	negative	3	3b	IVB	positive	yes	yes	yes	3.6	43.06	2.96	yes	5.7	14.1	DOD
37	M	76	negative	2	3b	IVB	positive	no	no	yes	4.2	48.7	5.18	no	72	72	NED
38	M	51	negative	4a	0	IVA	negative	yes	yes	yes	-	-	2.36	no	46.2	46.2	NED
39	M	57	negative	4a	2c	IVA	negative	yes	yes	yes	4.7	58.78	3.72	yes	6.8	31	DOD
40	M	46	negative	4b	3b	IVB	positive	no	yes	yes	4.6	63.01	8.79	no	65.9	65.9	DWOD
41	M	57	negative	4a	3b	IVB	positive	no	yes	yes	3.8	48.58	4.86	yes	3.6	12.4	DOD
42	M	56	negative	3	0	III	negative	no	no	yes	-	-	2.83	no	72.7	72.7	NED
43	M	45	negative	4b	2b	IVB	negative	yes	yes	yes	4.5	49.68	0.92	yes	10.1	19.4	DWOD
44	M	48	negative	4b	0	IVB	negative	yes	yes	yes	4.4	56.95	6.64	yes	49.9	79.8	AwD
45	M	52	negative	4b	3b	IVB	positive	no	yes	yes	4.4	55.17	4.9	yes	24.7	71.5	AwD
46	M	67	negative	3	2b	IVA	negative	yes	no	yes	4	47.01	4.66	no	68.4	68.4	NED
47	M	37	negative	3	2b	IVA	negative	yes	yes	yes	3.8	48.95	3.79	yes	3.6	3.7	DOD
48	M	42	negative	4a	3b	IVB	positive	yes	yes	yes	4.4	51.48	1.74	no	67.7	67.7	NED
49	M	44	negative	4b	2c	IVB	negative	yes	yes	yes	3.3	42.14	5.25	no	64.2	64.2	NED
50	M	54	negative	4a	0	IVA	negative	yes	yes	yes	3.7	44.33	2.41	yes	17.4	25	DWOD
51	M	41	negative	4a	0	IVA	negative	yes	yes	yes	3.9	47.29	2.55	yes	35.3	51.5	DOD
52	M	58	negative	4b	2c	IVB	negative	yes	yes	yes	3.8	43.17	1.88	yes	4	7.1	DOD
53	M	51	negative	4a	1	IVA	negative	yes	no	no	3.6	38.58	1.57	yes	12.3	60.1	DOD
54	M	50	negative	4b	2c	IVB	negative	yes	yes	yes	4.3	45.13	0.86	yes	4.2	26.1	DOD
55	M	53	negative	4a	2c	IVA	negative	yes	yes	yes	3.7	49.6	5.29	yes	35.4	45.9	DOD
56	M	46	negative	4a	3b	IVB	positive	yes	no	yes	4.7	55.97	2.63	yes	15.6	32	DOD
57	M	45	negative	4b	1	IVB	negative	yes	yes	yes	4.3	52.11	3.61	no	17.4	17.4	DWOD
58	M	64	negative	4b	3b	IVB	positive	yes	yes	yes	3.9	48.81	5.02	yes	7.8	18.5	DWOD
59	M	70	negative	4b	0	IVB	negative	yes	yes	no	4.1	53.31	2.38	no	26.2	26.2	DWOD
60	M	59	negative	4b	3b	IVB	positive	yes	yes	yes	4.3	50.61	3.07	no	59.6	59.6	NED
61	M	49	negative	3	2b	IVA	negative	yes	yes	yes	-	-	3.72	no	71.1	71.1	NED
62	M	66	negative	4b	3b	IVB	positive	yes	no	yes	3.17	38.6	3.87	yes	2.4	7.5	DOD
63	M	49	negative	2	3b	IVB	positive	yes	yes	yes	3.29	39.45	3.13	no	35.1	35.1	DWOD
64	M	67	negative	3	2c	IVA	negative	yes	yes	yes	3.42	38.2	1.67	yes	54.9	55.6	AwD
65	M	60	negative	4a	3b	IVB	positive	yes	no	no	4.45	60.61	7.19	yes	2.2	16.2	DOD
66	M	57	negative	4a	2c	IVA	negative	yes	yes	yes	4.4	49.37	3.03	no	21.8	21.8	DOD
67	M	50	negative	3	2c	IVA	negative	yes	yes	yes	3.99	43.43	3	yes	20.9	28.3	AwD
68	M	69	negative	4a	2c	IVA	negative	yes	no	yes	4.2	52.26	4.5	yes	16.4	64.6	AwD
69	M	49	negative	4a	3b	IVB	positive	yes	yes	yes	3.1	37.58	1.89	yes	10.1	12.5	DOD
70	M	85	negative	4a	1	IVA	negative	yes	yes	yes	3.8	42.53	3.28	yes	1.7	18.5	AwD
71	M	45	negative	4a	3b	IVB	positive	yes	yes	yes	4.5	51.16	2.74	yes	11.8	15.1	DOD
72	M	58	negative	4b	3b	IVB	positive	yes	yes	yes	3.8	44.88	2	yes	2.6	4.2	DOD
73	M	68	negative	2	3b	IVB	positive	yes	no	yes	-	-	6	yes	10.4	15.2	DOD
74	M	48	negative	4a	3b	IVB	positive	no	yes	yes	4.51	57.73	3.86	yes	57	58.8	AwD
75	M	42	negative	4a	0	IVA	negative	no	yes	yes	3.4	41.37	2.31	yes	3.1	19.6	DOD
76	M	64	negative	4b	3b	IVB	positive	no	no	yes	4.1	50.85	4.03	no	110.7	110.7	NED
77	M	59	negative	4b	3b	IVB	positive	yes	yes	yes	1.9	21.52	3	yes	2.4	4	DOD
78	M	42	negative	2	2b	IVA	negative	yes	yes	yes	4.2	50.69	2.81	yes	12.3	20.6	DOD
79	M	67	negative	3	0	III	negative	yes	yes	yes	4.1	52.34	4.91	yes	11.5	11.9	DOD
80	M	43	negative	2	2c	IVA	negative	yes	yes	yes	4.6	57.18	5.21	yes	63.6	111.8	AwD
81	M	42	negative	2	3b	IVB	positive	yes	yes	yes	4.7	60.97	5.43	no	109.8	109.8	NED
82	M	51	negative	4b	3b	IVB	positive	yes	yes	yes	2.1	28.09	2.7	yes	3.7	15.3	DOD
83	M	59	negative	4a	1	IVA	negative	yes	yes	yes	4.6	51.81	2.49	yes	3.5	29.5	DOD
84	M	53	negative	3	3b	IVB	positive	yes	yes	yes	4.4	50.97	2.47	yes	4.4	4.8	DOD
85	M	54	negative	4b	2b	IVB	negative	yes	yes	yes	3.9	48.57	6.11	no	100.8	100.8	NED
86	M	57	negative	4b	0	IVB	negative	yes	no	yes	3.7	47.05	4.37	no	80.7	80.7	DWOD
87	M	48	negative	4b	0	IVB	negative	yes	no	yes	3.8	52.39	3.41	no	20.7	20.7	DWOD
88	M	60	negative	4a	1	IVA	negative	yes	yes	yes	3.7	43.63	2.21	yes	5.9	19.4	DOD
89	M	57	negative	4a	0	IVA	negative	yes	yes	yes	4.5	52.52	6.96	yes	18.1	99.9	AwD
90	M	39	negative	2	3b	IVB	positive	yes	yes	yes	3.9	48.57	3.88	yes	3	10.8	DOD
91	M	66	negative	2	2c	IVA	negative	no	no	no	4.1	48.6	7.95	no	59.3	59.3	DWOD
92	M	39	negative	4b	0	IVB	negative	yes	yes	yes	4	43.99	2.02	yes	3.6	6.9	DOD
93	M	39	negative	2	3b	IVB	positive	yes	yes	yes	4.7	61.12	4.63	no	101.5	101.5	NED
94	M	76	negative	3	0	III	negative	yes	no	yes	3.7	48.29	4.18	yes	1.8	13.2	DWOD
95	M	65	negative	4b	0	IVB	negative	yes	yes	yes	4.3	48.1	4.48	no	68.5	68.5	NED
96	M	39	negative	4b	3b	IVB	positive	yes	yes	yes	4.2	50.4	2	yes	3.9	6.8	DOD
97	M	59	negative	4b	2b	IVB	negative	no	yes	yes	4.2	50.81	3.3	no	100.9	100.9	NED
98	M	48	negative	2	3b	IVB	positive	yes	yes	yes	3.9	48.36	3	yes	4.8	14.7	DOD
99	M	50	negative	4b	3b	IVB	positive	yes	yes	yes	3.6	42.54	2.11	yes	11.5	21.1	DOD
100	M	63	negative	1	2b	IVA	negative	no	yes	yes	4.2	55.16	3.99	no	54.5	54.5	DWOD
101	M	44	negative	4a	3b	IVB	positive	yes	yes	yes	4.7	58.48	3.12	yes	10.9	18.9	DOD
102	M	55	negative	4b	2b	IVB	negative	yes	yes	yes	4.2	50.86	4.24	no	97.9	97.9	NED
103	M	51	negative	3	3b	IVB	positive	yes	yes	yes	4	55.21	7.86	no	28.6	28.6	DWOD
104	M	40	negative	3	3b	IVB	positive	yes	yes	yes	4.1	52.24	3.6	yes	7.4	19.4	DOD
105	M	73	negative	1	2b	IVA	negative	no	no	no	4.2	48.8	3.81	yes	1.2	15	DWOD
106	M	54	negative	2	3b	IVB	positive	yes	yes	yes	4.4	54.63	4.06	yes	9.6	12.5	DOD
107	M	39	negative	4b	3b	IVB	positive	yes	yes	yes	4.2	55.86	4.05	yes	4.8	14.7	DOD
108	M	48	negative	2	3b	IVB	positive	yes	no	yes	4	52.43	4.26	yes	17	29	DOD
109	M	44	negative	4b	3b	IVB	positive	yes	no	yes	3.8	46.43	5.38	no	91	91	NED
110	M	39	negative	2	3b	IVB	positive	yes	yes	yes	4.3	53.72	3.26	yes	13.8	30.7	DOD
111	M	54	negative	4b	1	IVB	negative	yes	yes	yes	4.1	51.63	5.22	no	88	88	NED
112	M	56	negative	4a	1	IVA	negative	yes	no	yes	4.8	54.73	3.64	no	81.6	81.6	DWOD
113	M	73	negative	4a	0	IVA	negative	no	no	no	4.5	50.78	3.24	yes	16.2	16.2	DOD
114	M	52	negative	4b	3b	IVB	positive	yes	yes	yes	4.3	57.19	7.52	yes	32	78.3	AwD
115	M	53	negative	4b	0	IVB	negative	yes	yes	yes	4.9	53.18	2.03	yes	2.3	14.9	DOD
116	M	44	negative	2	3b	IVB	positive	yes	no	yes	3.9	50.09	5.71	no	84.7	84.7	NED
117	M	54	negative	4b	1	IVB	negative	yes	yes	yes	3.9	48.38	3.7	yes	8.9	27.4	DOD
118	M	62	negative	4a	3b	IVB	positive	no	no	no	3.8	47.94	4.69	yes	4.3	10.2	DOD
119	M	51	negative	3	0	III	negative	yes	yes	yes	3.4	45.8	6.69	yes	22.2	28.3	DOD
120	M	71	negative	4a	3b	IVB	positive	yes	yes	yes	4	53.59	5.81	yes	5.3	6.6	DOD
121	M	59	negative	2	1	III	negative	yes	yes	yes	3.7	46.45	2.96	no	29.1	29.1	DWOD
122	M	58	negative	4b	2b	IVB	negative	yes	yes	yes	3.5	42.25	2.96	yes	4.2	13.6	DOD
123	M	44	negative	4b	0	IVB	negative	yes	no	yes	3.7	42.92	2.47	no	26.7	26.7	DWOD
124	M	51	negative	2	3b	IVB	positive	yes	yes	yes	3.9	47.84	3.13	yes	8.7	19.1	DOD
125	M	81	negative	1	3b	IVB	positive	no	no	no	2.8	34.98	4.95	no	6.7	6.7	DOD
126	M	40	negative	4b	3b	IVB	positive	no	no	no	2.7	34.55	2.31	yes	3.5	7.5	DOD
127	M	56	negative	4a	0	IVA	negative	yes	yes	yes	4	48.39	6.24	no	82.3	82.3	NED
128	M	62	negative	3	3b	IVB	positive	no	no	no	4.2	46.27	2.74	yes	9	12	DOD
129	M	55	negative	4b	2b	IVB	negative	yes	yes	yes	3.9	43.29	3.18	no	59.8	59.8	DWOD
130	M	46	negative	4b	3b	IVB	positive	yes	yes	yes	3.6	43.48	2.77	yes	34.4	85.4	AwD
131	M	36	negative	3	3b	IVB	positive	yes	yes	yes	3.8	50.29	3.12	yes	8.4	12.6	DOD
132	M	56	negative	4b	2c	IVB	negative	no	no	yes	4.1	53.7	3.11	no	82.7	82.7	NED
133	M	40	negative	2	3b	IVB	positive	yes	yes	yes	4.7	51.35	1.75	no	75.5	75.5	NED
134	M	46	negative	2	3b	IVB	positive	yes	yes	yes	4.3	55.6	3.44	yes	13.1	42.4	DOD
135	M	77	negative	4b	3b	IVB	positive	yes	no	yes	3.8	43.29	5.48	no	48.5	48.5	DWOD
136	M	42	negative	4b	3b	IVB	positive	yes	yes	yes	3.6	42.81	4.3	yes	3	5	DOD
137	M	52	negative	2	3b	IVB	positive	no	no	no	4.1	50.36	2.79	yes	15.9	18.2	DOD
138	M	52	negative	2	1	III	negative	yes	yes	yes	4.2	51.44	5.01	no	62.7	62.7	NED
139	M	58	negative	2	3b	IVB	positive	yes	yes	yes	3.5	42.54	3.59	no	71.2	71.2	NED
140	M	80	negative	4b	0	IVB	negative	yes	yes	yes	-	-	2.2	yes	2.1	4.5	DOD
141	M	80	negative	3	2c	IVA	negative	yes	no	yes	4	49.29	4.43	yes	0.9	11.5	DOD
142	M	77	negative	4b	1	IVB	negative	no	yes	yes	3.3	41.47	1.56	no	37.7	37.7	NED
